# Supplementary material for: Protein–Protein Interactions More Conserved within Species than across Species
Source: PLOS journal article supplement (doi:10.1371/journal.pcbi.0020079), 2006-07-19
Supplement: S1 (10.1371/journal.pcbi.0020079.s001) [file journal.pcbi.0020079.s001]

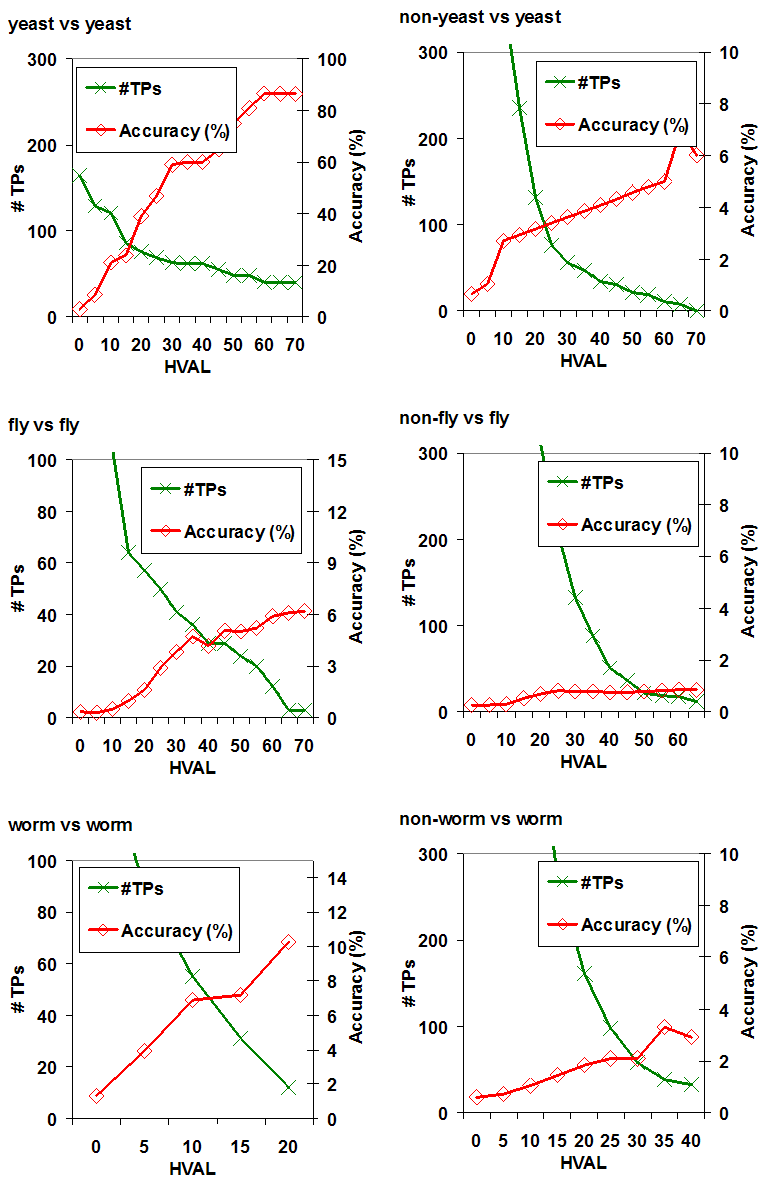


**Fig S1:** Each curve above shows the accuracy (red) as shown in Figure 3 (manuscript) and the number of true positives counted at a certain HSSP-value cutoff (green).
